# Comparative Expression Profile of miRNA and mRNA in Primary Peripheral Blood Mononuclear Cells Infected with Human Immunodeficiency Virus (HIV-1)

Ankit Gupta<sup>1</sup>\*, Pruthvi Nagilla<sup>1</sup>\*, Hai-Son Le<sup>2</sup>, Coulton Bunney<sup>1</sup>, Courtney Zych<sup>1</sup>, Anbupalam Thalamuthu<sup>3</sup>, Ziv Bar-Joseph<sup>2</sup>, Sinnakaruppan Mathavan<sup>3</sup>, Velpandi Ayyavoo<sup>1\*</sup>

**1** Department of Infectious Diseases and Microbiology, Graduate School of Public Health, University of Pittsburgh, Pittsburgh, Pennsylvania, United States of America, **2** Department of Machine Learning, Carnegie Mellon University, Pittsburgh, Pennsylvania, United States of America, **3** Human Genetics, Genome Institute of Singapore, Singapore

## Abstract

Host cells respond to exogenous infectious agents such as viruses, including HIV-1. Studies have evaluated the changes associated with virus infection at the transcriptional and translational levels of the cellular genes involved in specific pathways. While this approach is useful, in our view it provides only a partial view of genome-wide changes. Recently, technological advances in the expression profiling at the microRNA (miRNA) and mRNA levels have made it possible to evaluate the changes in the components of multiple pathways. To understand the role of miRNA and its interplay with host cellular gene expression (mRNA) during HIV-1 infection, we performed a comparative global miRNA and mRNA microarray using human PBMCs infected with HIV-1. The PBMCs were derived from multiple donors and were infected with virus generated from the molecular clone pNL4-3. The results showed that HIV-1 infection led to altered regulation of 21 miRNAs and 444 mRNA more than 2-fold, with a statistical significance of  $p < 0.05$ . Furthermore, the differentially regulated miRNA and mRNA were shown to be associated with host cellular pathways involved in cell cycle/proliferation, apoptosis, T-cell signaling, and immune activation. We also observed a number of inverse correlations of miRNA and mRNA expression in infected PBMCs, further confirming the interrelationship between miRNA and mRNA regulation during HIV-1 infection. These results for the first time provide evidence that the miRNA profile could be an early indicator of host cellular dysfunction induced by HIV-1.

**Citation:** Gupta A, Nagilla P, Le H-S, Bunney C, Zych C, et al. (2011) Comparative Expression Profile of miRNA and mRNA in Primary Peripheral Blood Mononuclear Cells Infected with Human Immunodeficiency Virus (HIV-1). PLoS ONE 6(7): e22730. doi:10.1371/journal.pone.0022730

**Editor:** Fabrizio Mammano, INSERM, France

**Received:** April 11, 2011; **Accepted:** June 29, 2011; **Published:** July 28, 2011

**Copyright:** © 2011 Gupta et al. This is an open-access article distributed under the terms of the Creative Commons Attribution License, which permits unrestricted use, distribution, and reproduction in any medium, provided the original author and source are credited.

**Funding:** This work was supported by ARRA supplement to U01 U0-AI35041 by the NIAID/NIH to VA. The funders had no role in study design, data collection and analysis, decision to publish, or preparation of the manuscript.

**Competing Interests:** The authors have declared that no competing interests exist.

\* E-mail: velpandi@pitt.edu

† These authors contributed equally to this work.

## Introduction

There is remarkable variation in the onset of disease in HIV-1 infected individuals. The replication, spread, and immune evasion of the virus and the progression of disease depend on host cellular transcription and gene regulation in virus-specific target cells and immune cells [1,2,3]. Both viral and host cellular factors have been shown to contribute to infection, virus replication, and disease progression. Viral factors include free-extracellular (cell- and virus-free), virion-associated, and infected cell-associated viral antigens, as well as infectious and noninfectious virus particles. HIV-1 virus with defective expression of viral proteins such as Nef, Vpr, Gag, and Pol are shown to induce differential gene expression [4,5,6]. Host factors include host genetics (determined by HLA alleles), polymorphisms in HIV receptors and coreceptors, and genes involved in innate and adaptive immune responses [7,8,9,10]. Following the landmark discovery of the *CCR5-Δ32* mutation that protects against HIV infection [11,12,13], many other genetic variants have been shown to affect HIV infection and AIDS pathogenesis [7,14,15].

It is likely that, in addition to incomplete immunological control, host genetic variation and differences in gene expression in the infected host cells may also contribute to the differential disease pattern [16,17,18]. Along these lines, attempts were made to identify host cellular proteins associated with HIV-1 infection [19,20,21,22]. There is limited information, however, regarding the regulation of host cellular genes at the transcriptional, post-transcriptional, and translational levels.

Several studies have shown that HIV-1 infection differentially regulates host cellular genes and pathways, suggesting that differential gene expression in infected individuals either accelerates disease progression or enhances resistance to the development of disease [23,24,25]. Genome-wide association studies have not fully defined the resistance in exposed uninfected sex workers or elite controllers, indicating a role for other host cellular factors [26]. Studies delineating the cellular factors in individuals who remain uninfected despite repeated exposures to the virus have found that they over-express anti-viral innate factors, such as RANTES, SLPI, and other chemokines [27]. It is important to note that the differential expression of host cellular genes is not

universal, resulting in disease progression at variable rates in infected individuals [28,29,30].

Gene expression in general is regulated at transcriptional, post-transcriptional, and translational levels. Recent discoveries have emphasized a central role for the new class of small non-coding RNA in gene expression controlling growth, development, and immune response *in vivo* [31,32,33]. These non-coding RNAs, which include microRNA (miRNA), partition function for interacting RNA (piRNA), and small interfering RNA (siRNA), are emerging as a major component of the cellular regulatory pathways that underlie the development and physiology of complex organisms [34,35,36]. Regulation of gene expression by miRNA occurs primarily at the post-transcriptional level [37,38]. Recent studies have shown that miRNA have a unique expression profile in cells of the innate and adaptive immune systems, CNS, and cancers [39,40,41,42]. Based on these observations, we suggest that pathogens including viruses could potentially modulate host cellular transcription at multiple levels by targeting various factors including miRNAs.

Studies previously have evaluated the expression of either miRNA or mRNA in cells isolated from HIV-1 infected subjects [43,44,45,46]. Their results are likely to be influenced by variabilities in host genetics and viral heterogeneity in addition to other factors including viral burden. In an effort to understand host cellular gene regulation during HIV-1 infection, we performed a comparative global miRNA and mRNA microarray profiling in PBMCs derived from multiple donors upon infection with HIV-1. Our results indicate that HIV-1 infection differentially regulated several miRNAs that could potentially regulate host cellular pathways such as cell cycle, apoptosis, T cell signaling and cytokine/chemokine responses. Taken together, these results for the first time provide evidence that the miRNA profile could be an early indicator of HIV-1 induced host cellular dysfunction.

## Materials and Methods

### Generation of infectious HIV-1

The infectious HIV-1 particles were generated by using the proviral DNA construct pNL4-3 obtained from the National Institutes of Health AIDS Research and Reference Reagent Program (NIH AIDS RRRP). Two million HEK293T cells (a kind gift from Dr. Michelle Calos, Stanford University) were transfected with 5  $\mu$ g of proviral DNA using Polyjet (SigmaGen) as suggested by the manufacturer. Virus titer was measured by p24 antigen ELISA, and infectivity was assessed by determining multiplicity of infection (MOI) using the HIV-1 reporter cell line TZM-bl (NIH AIDS RRRP) as described earlier [47].

### Isolation and infection of PBMCs with HIV-1 virus

We purchased normal donor blood from the American Red Cross Blood Bank in Pittsburgh using appropriate IRB approval forms from the University of Pittsburgh. PBMCs were isolated by Ficoll-Hypaque gradient centrifugation. Freshly isolated normal donor PBMCs ( $5 \times 10^6$ /mL) were stimulated with 5  $\mu$ g/ml PHA-P (Sigma, St. Louis, MO) for three days. Cells were washed, divided into two parts and cultured in RPMI medium (GIBCO, CA) containing 10% FBS (Hyclone, Logan, UT), 1% L-glutamine (Cambrex, MD), 1% penicillin-streptomycin (GIBCO, CA), and IL-2 (200 U/mL, Chiron, Emoryville, CA). One half of the cells were subsequently infected with 0.1 MOI of virus particles using standard protocols as described [48] and the remaining half of the culture is maintained under similar conditions and used as control. Seven days post infection (pi), culture supernatants were assessed by p24 ELISA for infection and virus replication [47]. Cells were

collected and frozen for miRNA and mRNA isolation. We performed a total of 16 independent experiments using donor PBMCs (n = 16).

### Total and miRNA isolation

PBMCs (both infected and control) were collected, washed with PBS, and lysed for RNA isolation. Total RNA was isolated using the TRIzol method (Invitrogen) as suggested by the manufacturer. Next, to enhance the sensitivity and detection, we enriched the small RNA using a microRNA isolation kit (SABiosciences) with two separating columns as per the manufacturer's instructions. This allowed us to isolate both miRNA and mRNA, which were used in the miRNA array and gene expression arrays, respectively. RNA quality was determined by chip-based capillary electrophoresis using Agilent Bioanalyzer 2100 (Agilent, CA), according to the manufacturer's instructions.

### MiRNA profiling using RT<sup>2</sup> MicroRNA PCR Array

For miRNA profiling studies, we used the SABiosciences RT<sup>2</sup> MicroRNA PCR Array system, an optimized real-time PCR assay, which allows the simultaneous detection of 704 miRNAs, representing most functional miRNAs, as well as appropriate housekeeping assays and RNA quality controls. We performed the assay according to the manufacturer's protocol. Enriched miRNA was converted to cDNA using an miRNA first strand synthesis kit. First strand was used to perform the miRNA PCR array using a Taqman 7900HT machine. Equal amounts of RNA from both infected and uninfected cells were used for the first strand and assayed as per the manufacturer's protocol.

### Gene expression profiling

For total mRNA profiling, we used the Illumina HT-12 array, which targets more than 25,000 annotated genes with more than 48,000 probes covering well-characterized genes, gene candidates, and splice variants. One  $\mu$ g of high-quality total RNA from each sample was used to generate cDNA. Sample labeling, hybridization, and scanning were performed according to the manufacturer's protocols as well as standardized protocols developed by the core laboratory at the University of Pittsburgh. Data analysis was performed using the Illumina software to delineate the false discovery rate (FDR) and differences with statistical significance ( $p < 0.05$ ).

### Microarray data analysis

We analyzed the expression of individual miRNA using CT values obtained with a threshold of 0.2. Endogenous controls, RT negative controls, and genomic DNA contamination controls were tested for each array. If a particular miRNA in either the control or the experiment samples showed expression at least three times with a value of 35 or greater, it was excluded from the analysis as undetectable or undetermined. We uploaded values (CT) that passed through these stringent criteria into the SABiosciences software (RT<sup>2</sup> Profiler PCR Array Data Analysis) and calculated fold change for each miRNA. Data were further subjected to statistical analysis using the manufacturer's web-based software to define the difference with significant p value ( $p \leq 0.05$ ) between the two groups.

### Validation of differentially regulated miRNA and mRNA from the genome-wide array

Based on the data analyses, selected miRNA and mRNA targets were verified by qRT-PCR using specific primers and probes (Applied Biosystems). We used RNA samples (n = 6) from the

miRNA microarray profiling to validate the high throughput microarray results. Additional validation was performed by infecting under similar conditions normal donor PBMCs ( $n = 10$ ) that were not part of the miRNA microarray.

### Computational analysis validating the miRNA targets and mRNAs

To identify mRNA targets of miRNAs in the samples, we used GenMIR++ [49], a novel regression-based Bayesian method developed to identify targets of miRNAs by integrating the measured expression data for miRNAs and mRNAs with a database of a potential set of mRNA targets for each miRNA. GenMIR++ takes into account the downregulation of target mRNAs by modeling the expression of each targeted mRNA as a negatively weighted sum of the expressions of multiple miRNAs with some additional Gaussian noise. The method restricts the set of possible targets for each miRNA to a set of candidate mRNAs given *a priori*. This potential set of targets for each miRNA is derived based on sequence analysis. For this paper, we used predictions from the MicroCosm Targets database [50] to determine this set. For the GenMIR++ analysis, we first used the R package samr [51] to detect differentially expressed mRNAs by using an FDR cutoff of 10%. We next combined these mRNAs with the differentially expressed miRNAs, leading to 2,941 mRNAs and 327 miRNAs that were used as input to GenMIR++. The plots show the top 10% of interactions predicted by GenMIR++ ranked by their p-values.

### Pathway analysis

To determine gene interactions and correlation networks, we used Ingenuity Pathway Analysis, STRING, and KEGG. The cutoff values for inclusion in these analyses were differential gene expression, with p-value  $< 0.05$  and 2.0 in fold change (based on SAM). Genes identified from miRNA-based predicted targets (score of  $> 70$ ) were also assessed to define the potential networks and pathways.

## Results

### Infection and miRNA and mRNA quality from PBMC from multiple donors

The goal of our study was to analyze the potential link between miRNA and mRNA in HIV-1 infected cells. We hypothesized that infection of target cells such as PBMCs by HIV-1 may lead to the following scenarios: i) The infection may regulate an identical subset of miRNA in cells derived from genetically diverse individuals, and ii) The changes in miRNA may have an impact on mRNA in genes associated with distinct cellular pathways.

We used PBMCs from multiple donors to validate the differential regulation of miRNA and mRNA profiles by HIV-1 infection. All the donors were healthy and seronegative for HIV-1. To eliminate variability with regard to the virus, we used a well-characterized virus derived from a molecular clone. Infectivity was assessed by qRT-PCR using HIV-1 Gag-specific primers and probes as described [52] employing an equal amount of RNA. The presence of Gag was determined by normalizing with endogenous control and presented as CT values (Figure 1A). Samples with low and high CT values ( $< 12$  or  $> 30$ ) were eliminated from further profiling studies (Higher CT value ( $> 30$ ) indicate inefficient virus replication and lower CT value ( $< 12$ ) indicate high infectivity and infection induced cell death). Results indicate that infected cultures of PBMCs showed the presence of Gag with an average CT value of  $21.88 \pm 1.12$ , indicating virus replication. Gag CT value was below the level of detection in the uninfected control. Cell death

was assessed in the infected and uninfected cultures before RNA isolation (Figure 1B). Cell death in uninfected cultures ranged from 0 to 27% (an average of  $8.4 \pm 2.2\%$ ), whereas infected cultures showed a higher percentage (16–50%, with an average of  $29.33 \pm 2.4\%$ ). To ensure RNA quality, infected cultures with high cell death ( $> 50\%$ ) were not included in microarray analysis.

RNA isolated from these cultures was tested for quality by spectrophotometry and by Taqman assays for endogenous control miRNAs and mRNA species. Each sample was tested for two miRNA and two small RNA controls (Table 1). All but two donors showed CT values ( $> 30$ ) for endogenous controls. These two donors were eliminated from further analyses to avoid bias because the quality of RNA in these samples may not have been ideal for qRT-PCR profiling.

### HIV infection differentially regulated expression of multiple miRNAs

The expression profile of 704 host cellular miRNAs was assessed in infected and uninfected PBMCs from multiple donors ( $n = 6$ ). Results revealed that HIV-1 infection differentially regulated expression of several miRNAs (Tables S1 and S2). The level of expression in infected cells was compared with that in uninfected cells, and fold differences were calculated based on normalization with internal controls. The fold differences ranged between 2- and 88-fold for different miRNAs. Among the total 704 miRNAs tested, 208 were upregulated (Table S1) by more than 2-fold compared to controls, and 14 were downregulated (Table S2) compared to controls. Further analyses indicated that among these 222 miRNAs, 41 were upregulated ( $> 4$ -fold) and five were downregulated ( $> 4$ -fold).

To further assess the significance of our data, we performed statistical analyses to identify the regulated miRNA in the infected and the uninfected groups, using 2-fold as the cutoff (Figure 2; Table 2). Results indicate that among the 208 upregulated miRNAs, 21 exhibited significant changes across multiple donors (p value of  $< 0.05$ ). It is interesting to note that none of the 14 miRNAs that showed downregulation exhibited significant p value. Heatmap analyses further cluster the miRNA species between the test groups (Figure 2). Together these results indicate that fold differences did not necessarily correlate with the differential regulation of miRNAs in multiple donors.

Based on these analyses, we selected the differentially regulated miRNAs with significant p value ( $< 0.05$ ) for further analyses. To understand the significance of these miRNAs in host cellular functions, we identified target genes using TargetScan followed by IPA analysis (Table 2). Our results indicate that HIV-1 infection targets cellular genes primarily involved in cell cycle, proliferation, cellular movement and migration, and cell signaling. Previous studies have reported findings that virus infection and viral antigens modulate these host cellular pathways [53,54].

### Validation of miRNA expression by qRT-PCR

To validate the differentially regulated miRNAs from the microarray results, we randomly selected the nine miRNAs from Table 2 (miRNA with 2-fold change and  $p < 0.05$ ) and the five miRNAs from Tables S1 and S2 (miRNA with 2-fold increase but  $p > 0.05$ ). We tested RNA from the infected and uninfected control pair from multiple donor PBMCs for specific miRNA along with endogenous controls using miRNA specific primers and probes by qRT-PCR (Figure 3). Results indicate that among the nine upregulated miRNAs tested from Table 2, all except miR-628-3p showed upregulation by independent qRT-PCR assay. Although miR-628-3p showed upregulation in miRNA profiling, all donors used in independent validation did not show significant upregula-

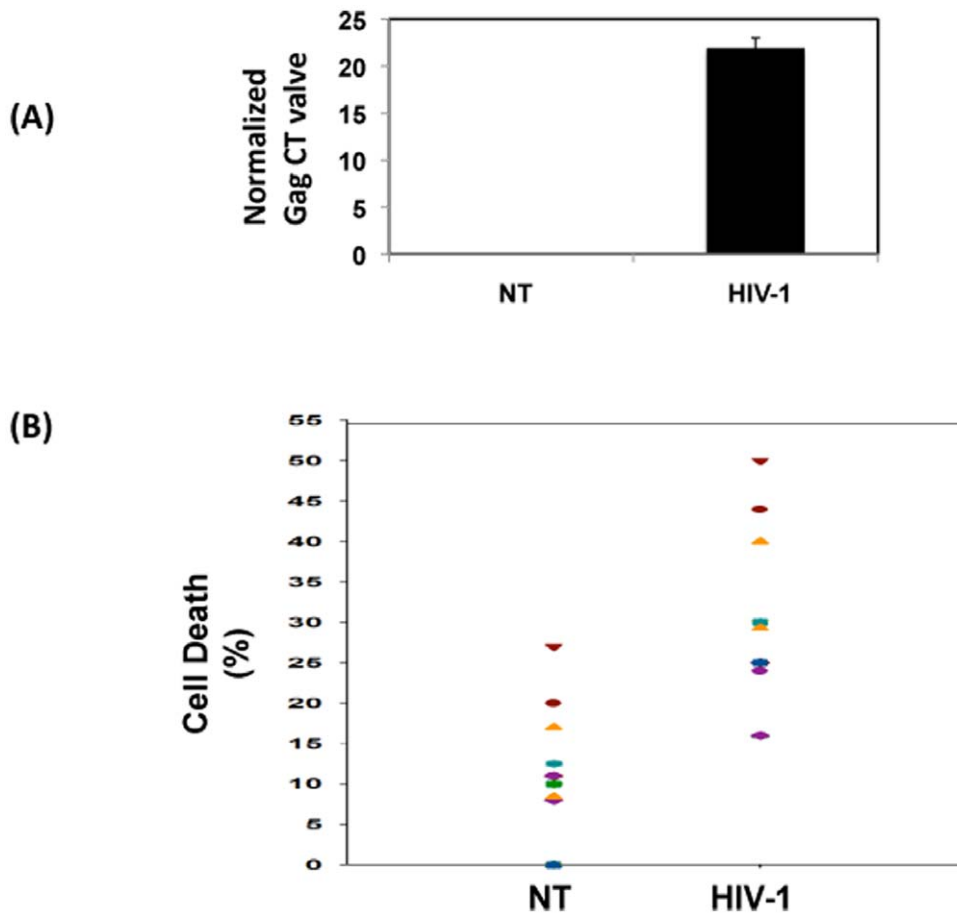

**Figure 1. Infectivity in and cell death in PBMCs used for analyses.** (A) Normal donor PBMCs were infected with HIV-1 or mock infected for seven days. RNA was isolated and tested for Gag by RT-PCR. Gag CT values were obtained by using the endogenous control for normalization. Figure shows average CT value from 16 independent donors. (B) After seven days, post-infection cell death was assessed by trypan blue dye exclusion method. Dot blot represents percentage of cell death in uninfected (NT) and infected (HIV-1) PBMCs from 16 independent donors. doi:10.1371/journal.pone.0022730.g001

tion, thus resulting in no change. This could be due to variations within donors or due to design of primer/probes used in qRT-PCR. Similarly, the single downregulated miRNA, miR-120, showed downregulation in most of the tested samples. This was

validated in both the samples that were used to perform the genome-wide microarray ( $n = 6$ ) and additional PBMCs ( $n = 10$ ) infected in a similar manner, suggesting that these miRNAs are consistently regulated across multiple donors. Validation of

**Table 1.** Selected endogenous controls and their Ct values.

| Endogenous controls | Control #1 | Control #2 | Control #3 | Control #4 | Control #5 | Average |
|---------------------|------------|------------|------------|------------|------------|---------|
| SNORD48/RNU48/U48   | 25.49      | 25.07      | 26.8       | 25.8       | 24.65      | 25.56   |
| SNORD47/U47         | 19.27      | 21.37      | 19.52      | 21.32      | 22.47      | 20.79   |
| SNORD44/U44         | 17         | 18.9       | 17.64      | 19.77      | 22.69      | 19.2    |
| RNU6-2/U6-2         | 20.82      | 22.35      | 20.84      | 21.16      | 23.35      | 21.70   |
| Endogenous controls | HIV-1 #1   | HIV-1 #2   | HIV-1 #3   | HIV-1 #4   | HIV-1 #5   | Average |
| SNORD48/RNU48/U48   | 20.31      | 24.46      | 27.57      | 23.16      | 25.49      | 24.198  |
| SNORD47/U47         | 19.48      | 17.83      | 20.72      | 19.45      | 24.7       | 20.436  |
| SNORD44/U44         | 18.97      | 15.69      | 18.53      | 19.17      | 21.67      | 18.806  |
| RNU6-2/U6-2         | 17.82      | 18.35      | 21.35      | 19.57      | 24.37      | 20.292  |

RNA isolated from infected and uninfected PBMCs was evaluated first for the level of endogenous controls by RT-PCR using specific primers and probes as a measure of RNA quality and quantity before microarray analysis. Five representative donors out of 16 donors are presented here. doi:10.1371/journal.pone.0022730.t001

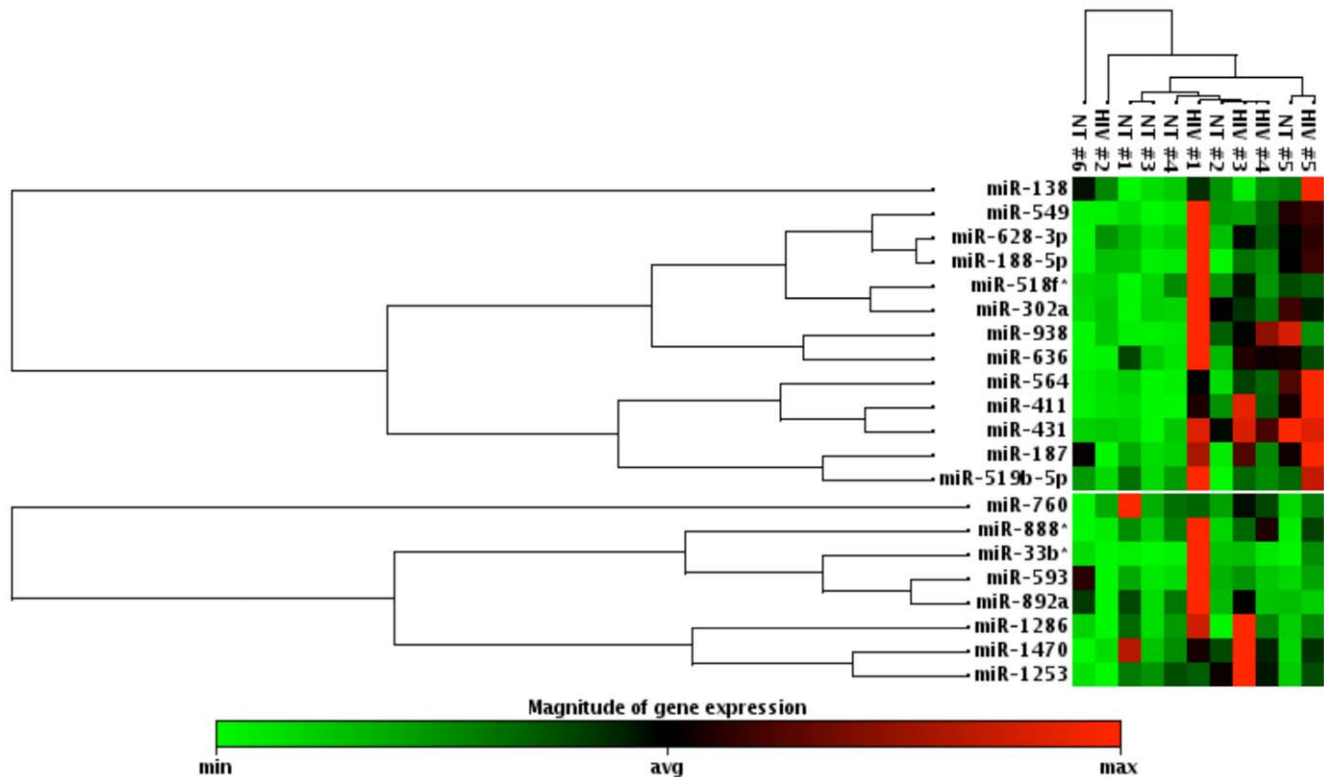

**Figure 2. Heatmap and hierarchical clustering of miRNA.** The heatmap represents the result of the two-way hierarchical clustering of miRNA and samples. Each row represents miRNA, and each column represents samples tested. The clustering is represented for the miRNA and samples on top and sides, respectively. Red represents miRNA with an expression level above the mean, and green represents miRNA with an expression level below mean/average.

doi:10.1371/journal.pone.0022730.g002

miRNA in both the samples further confirms that the array analyses in our samples are reproducible.

### HIV-1 induced gene regulation of cellular mRNA transcripts

miRNAs regulate cellular gene expression at the post-transcriptional level, thus silencing and/or downregulating gene expression [55,56]. To assess whether a direct correlation exists between the expression patterns of miRNA and mRNA, we assessed the expression profile of mRNA transcripts present in HIV-1 infected PBMCs and in uninfected control cells from the same donor. Microarray profiling of mRNA samples was normalized with the internal endogenous control and cross-compared between the two groups.

Among the 48,000 transcripts tested, we found that 444 genes were differentially regulated in the infected culture compared to uninfected controls. Of the 444 differentially regulated genes, 147 were upregulated and 297 were downregulated significantly (FDR corrected with  $p$  value of  $<0.05$  with 2-fold regulation). We analyzed these mRNA transcripts to identify the pathways using STRING, IPA, and DAVID databases. To further analyze the interplay between the up- and downregulated mRNA, all the differentially regulated mRNA were combined and evaluated. The results, which are presented in Figure 4, indicate that HIV-1 infection regulates three major clusters including SRC kinases, MAPK, and apoptosis/cell cycle regulators. Similar results were reported by previous studies using transcriptome analysis in HIV-1 infected target cells [45,46]. Results presented in Figure 4 include both upregulated and downregulated genes. To understand whether HIV-1 targets specific

pathways for up- or downregulation, we performed individual pathway analyses (Table 3 & 4). Results from the upregulated genes include clusters of genes that control cell cycle, apoptosis, DNA damage pathways, and several signaling pathways including MAPK, p53, TRL, and T-cell receptor (Table 3). In contrast, analyses of downregulated gene clusters include primarily anti-apoptotic proteins/pathways, NF- $\kappa$ B mediated immune dysregulation, and SRC kinases (Table 4). Additional analyses using various software and databases yielded similar results (data not shown). Collectively, these results indicate that several pathways are regulated by HIV-1 infection including inflammatory response, cell death, cell-to-cell signaling and interaction, and immune function.

### Computational analysis validating the miRNA targets and mRNAs

Gene expression is regulated at the transcriptional and the post-transcriptional levels. A single miRNA can potentially regulate multiple mRNA; the opposite is also possible [57]. To further validate whether the observed expression profile of mRNA is directly and/or indirectly regulated by miRNA, we performed a comprehensive computational analysis of mRNA and miRNA expression profiles in HIV-1 infected samples as well as in the uninfected controls. The log ratio of infected to control for both mRNA and miRNA was normalized as suggested by the manufacturers' software (Illumina and SABiosciences) to eliminate the false discovery rate and statistical significance across multiple samples. We used the Significance Analysis of Microarray (SAM) [51] and identified 2,941 differentially expressed genes (mRNAs), which we retained for further studies.

**Table 2.** Significantly regulated miRNAs in HIV-1 infected cultures compared to uninfected control cells.

| Mature ID   | Fold change | p value   | #Predicted targets | Cellular function based on predicted targets through TargetScan and IPA analysis |
|-------------|-------------|-----------|--------------------|----------------------------------------------------------------------------------|
| miR-593     | 2.3247      | 0.0010    | 67                 | Amino acid Metabolism                                                            |
| miR-431     | 4.2845      | 0.009372  | 25                 | Cell growth and proliferation                                                    |
| miR-892a    | 2.4136      | 0.013     | 122                | Cellular function and Maintenance                                                |
| miR-138     | 2.1364      | 0.013     | 44                 | Cell Morphology                                                                  |
| miR-564     | 4.8795      | 0.0130 79 | 7                  | N/A                                                                              |
| miR-628-3p  | 4.6012      | 0.017119  | 60                 | Cell Signaling                                                                   |
| miR-411     | 8.2454      | 0.018815  | 29                 | Cell Cycle                                                                       |
| miR-518f*   | 3.3215      | 0.0308    | 10                 | DNA Replication, Recombination and Repair                                        |
| miR-187     | 2.0631      | 0.035     | 4                  | N/A                                                                              |
| miR-188-5p  | 6.1813      | 0.037526  | 72                 | Cell Cycle                                                                       |
| miR-938     | 3.6903      | 0.0399    | 15                 | Cellular Development                                                             |
| miR-1253    | 3.1465      | 0.0419    | 106                | Cellular function and Maintenance                                                |
| miR-1470    | 3.317       | 0.0425    | 2                  | N/A                                                                              |
| miR-549     | 5.3005      | 0.04538   | 60                 | Cell Cycle                                                                       |
| miR-888*    | 4.8503      | 0.0469    | 153                | Cellular function and Maintenance                                                |
| miR-33b*    | 2.9726      | 0.0484    | 79                 | Cellular Assembly and Organization                                               |
| miR-519b-5p | 2.8366      | 0.050     | 50                 | Nucleic acid Metabolism                                                          |
| miR-302a    | 3.6139      | 0.050     | 164                | DNA Replication, Recombination and Repair                                        |
| miR-1286    | 3.3554      | 0.0523    | 34                 | Carbohydrate Metabolism                                                          |
| miR-636     | 2.5808      | 0.0548    | 47                 | Cell Cycle                                                                       |
| miR-760     | 2.9002      | 0.0575    | 42                 | Cell Signaling                                                                   |

This table lists miRNAs that are significantly regulated (over expressed) with a significance of  $p < 0.05$  in HIV-1 infected cultures compared to uninfected control cells.

\* Column represents targets identified through miRDB having a target score  $\geq 70$ .

doi:10.1371/journal.pone.0022730.t002

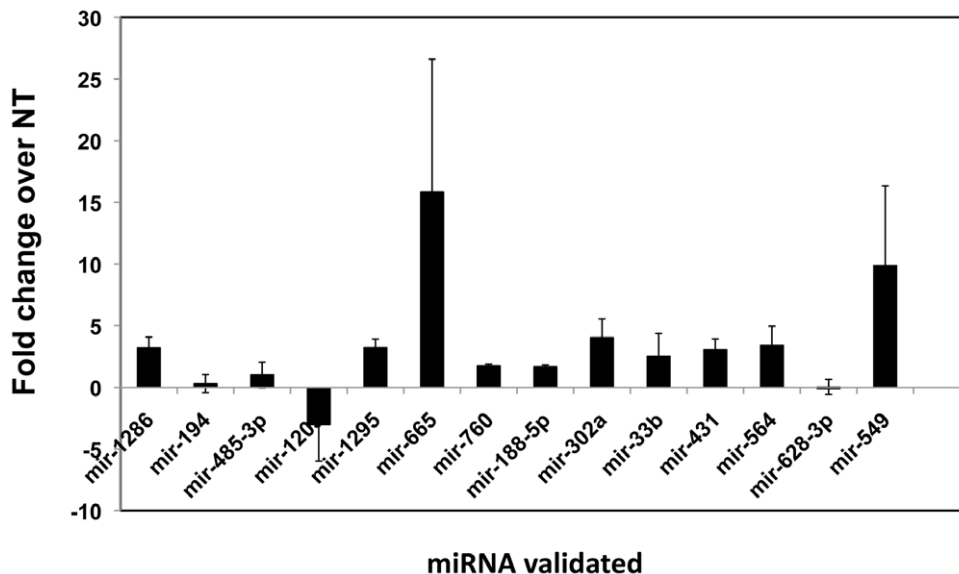

**Figure 3. Quantitative real time RCR (qRT-PCR) confirmation of randomly selected miRNAs from the microarray analysis.** The expression of selected miRNAs in PBMCs infected with HIV-1 along with the expression of uninfected controls were tested for validation by qRT-PCR using a specific primer and probe for each miRNA. Fold increase/decrease was calculated based on endogenous control normalization. Average fold change for each miRNA represents fold change obtained from 10 independent donors.

doi:10.1371/journal.pone.0022730.g003

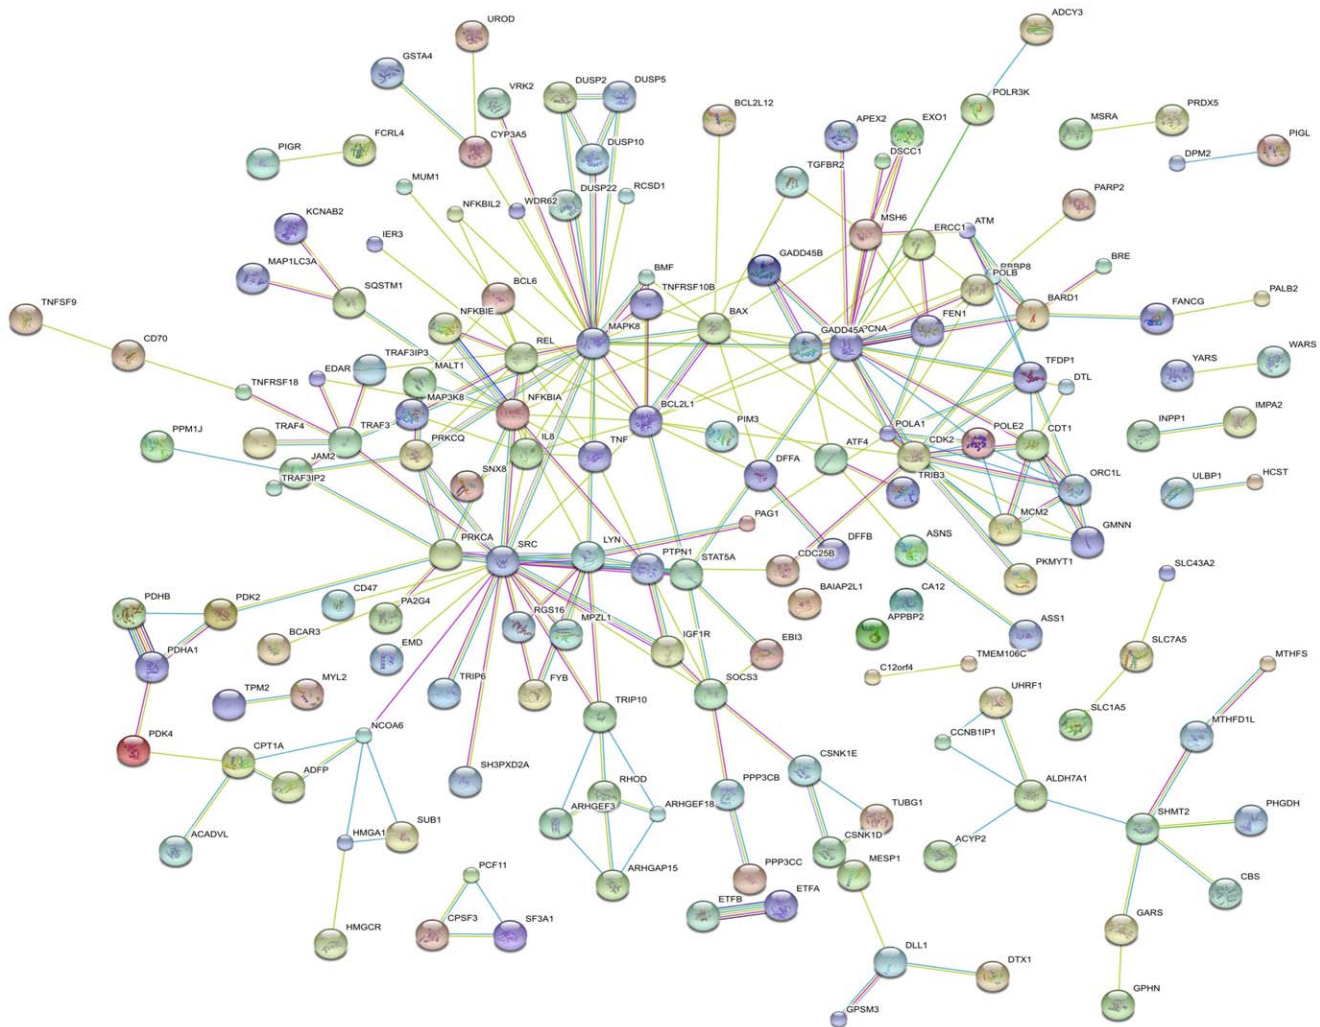

**Figure 4. Predicted interaction networks of genes regulated during HIV-1 infection.** Differentially regulated genes are represented in the links predicted using STRING (<http://string.embl.de/>). Predicted interactions represent both direct and indirect associations that are derived from four different sources: genomic context, high throughput experiments, conserved co-expression, and previous findings from the literature. The nature of the supporting evidence is indicated by the color lines: green represents neighborhood; red, gene fusion; blue, co-occurrence; black, co-expression; purple, previous experiments; turquoise, database; yellow, text mining; and aqua, homology.  
doi:10.1371/journal.pone.0022730.g004

**Table 3. Genes upregulated in the HIV-1 infected culture compared to uninfected control cells, determined by transcriptome analysis.**

| Canonical Pathways                        | Count | p Value  | Genes                                         |
|-------------------------------------------|-------|----------|-----------------------------------------------|
| MAPK signaling                            | 6     | 1.30E-05 | PPP3CC; CACNA1I; PPP3CB; PRKCA; TGFB2; CDC25B |
| T-cell receptor signaling                 | 4     | 5.29E-05 | MALT1; PPP3CC; PPP3CB; PRKQC                  |
| Natural killer cell mediated cytotoxicity | 4     | 1.32E-04 | PPP3CC; PPP3CB; PRKCA; HCST                   |
| Wnt signaling                             | 4     | 1.91E-04 | WNT7A; PPP3CC; PPP3CB; PRKCA                  |
| Calcium signaling                         | 4     | 3.96E-04 | PPP3CC; CACNA1I; PPP3CB; PRKCA                |
| B-cell receptor signaling                 | 3     | 3.78E-04 | MALT1; PPP3CC; PPP3CB                         |
| Long-term potentiation                    | 3     | 3.78E-04 | PPP3CC; PPP3CB; PRKCA                         |
| VEGF signaling                            | 3     | 3.93E-04 | PPP3CC; PPP3CB; PRKCA                         |
| Apoptosis                                 | 3     | 6.24E-04 | PPP3CC; PPP3CB; ATM                           |
| Cell cycle                                | 3     | 0.00144  | CDC14B; ATM; CDC25B                           |
| Tight junction                            | 3     | 0.00211  | CLDN18; PRKCA; PRKQC                          |

doi:10.1371/journal.pone.0022730.t003

**Table 4.** Genes downregulated in the HIV-1 infected culture compared to uninfected control cells determined by transcriptome analysis.

| Pathways                                        | #  | p Value  | Gene                                                                   |
|-------------------------------------------------|----|----------|------------------------------------------------------------------------|
| Cell cycle                                      | 10 | 1.80E-10 | MCM2; MCM7; PKMYT1; CDK2; GADD45B; MAD2L2; TFDP1; GADD45A; PCNA; ORC1L |
| Apoptosis                                       | 8  | 7.26E-09 | IRAK2; NFKBIA; BCL2L1; TNFRSF10B; BAX; DFFA; EXOG; TNF                 |
| Purine metabolism                               | 8  | 4.74E-07 | ADA; ADCY3; ADCY8; POLA1; POLR3K; POLE2; GART; DGUOK                   |
| MAPK signaling                                  | 8  | 3.71E-05 | MAP3K8; GADD45B; DUSP2; ATF4; GADD45A; DUSP5; TNF; DUSP10              |
| Cytokine-cytokine receptor interaction          | 7  | 1.92E-04 | TNFSF9; TNFRSF10B; CD70; IL8; TNF; TNFRSF18; TNFSF13B                  |
| DNA polymerase                                  | 5  | 5.76E-07 | MCM2; MCM7; POLA1; PCNA; POLE2                                         |
| Base excision repair                            | 5  | 5.76E-07 | PARP2; PCNA; POLE2; APEX2; POLB                                        |
| Adipocytokine signaling                         | 5  | 1.32E-05 | SOCS3; NFKBIA; TNF; NFKBIE; CPT1A                                      |
| p53 signaling                                   | 5  | 1.52E-05 | CDK2; GADD45B; TNFRSF10B; BAX; GADD45A                                 |
| Epithelial cell signaling in H.pylori infection | 5  | 1.63E-05 | NFKBIA; LYN; IL8; JAM2; SRC                                            |
| Small cell lung cancer                          | 5  | 4.44E-05 | NFKBIA; BCL2L1; CDK2; TRAF3; TRAF4                                     |
| Toll-like receptor signaling                    | 5  | 1.00E-04 | NFKBIA; MAP3K8; IL8; TNF; TRAF3                                        |
| One carbon pool by folate                       | 4  | 6.80E-07 | SHMT2; GART; MTHFS; MTHFD1L                                            |
| Urea cycle and metabolism of amino groups       | 4  | 7.33E-06 | ASS1; ACY1; ALDH7A1; SMS                                               |
| Aminoacyl-tRNA biosynthesis                     | 4  | 3.46E-05 | WARS; YARS; GARS; RARS                                                 |
| Glycine, serine and threonine metabolism        | 4  | 4.19E-05 | CBS; PHGDH; SHMT2; GARS                                                |
| Gap junction                                    | 4  | 8.33E-04 | ADCY3; ADCY8; CSNK1D; SRC                                              |
| Pyrimidine metabolism                           | 4  | 8.33E-04 | UPP1; POLA1; POLR3K; POLE2                                             |
| GnRH signaling                                  | 4  | 0.00140  | ADCY3; ADCY8; ATF4; SRC                                                |
| T cell receptor signaling                       | 4  | 0.00150  | NFKBIA; MAP3K8; TNF; NFKBIE                                            |
| Tight junction                                  | 4  | 0.00335  | CGN; MYL2; JAM2; SRC                                                   |
| Insulin signaling                               | 4  | 0.00353  | TRIP10; SOCS3; PFKM; PTPN1                                             |
| Mismatch repair                                 | 3  | 1.46E-04 | MSH6; PCNA; EXO1                                                       |
| Arginine and proline metabolism                 | 3  | 5.66E-04 | ASS1; PYCR1; RARS                                                      |
| Nucleotide excision repair                      | 3  | 0.00102  | ERCC1; PCNA; POLE2                                                     |
| Fatty acid metabolism                           | 3  | 0.00109  | ACADVL; ALDH7A1; CPT1A                                                 |
| Glutathione metabolism                          | 3  | 0.00148  | GSTA4; GGCT; SMS                                                       |
| Inositol phosphate metabolism                   | 3  | 0.001952 | IMPA2; INPP1; ITPKA                                                    |
| Amyotrophic lateral sclerosis                   | 3  | 0.002056 | BCL2L1; BAX; TNF                                                       |
| Hedgehog signaling                              | 3  | 0.002163 | CSNK1E; CSNK1D; RAB23                                                  |
| Glycolysis/Gluconeogenesis                      | 3  | 0.003010 | ALDH7A1; PFKM; GCK                                                     |
| Drug metabolism cytochrom.p450                  | 3  | 0.00419  | GSTA4; FMO4; CYP3A5                                                    |
| B-cell receptor signaling                       | 3  | 0.0047   | NFKBIA; LYN; NFKBIE                                                    |
| Chronic myeloid leukemia                        | 3  | 0.0047   | NFKBIA; BCL2L1; STAT5A                                                 |
| Phosphatidylinositol signaling                  | 3  | 0.0048   | IMPA2; INPP1; ITPKA                                                    |
| Prostate cancer                                 | 3  | 0.0073   | NFKBIA; CDK2; ATF4                                                     |
| NK cell mediated cytotoxicity                   | 3  | 0.0243   | TNFRSF10B; ULBP1; TNF                                                  |
| Jak-STAT signaling                              | 3  | 0.0327   | SOCS3; BCL2L1; STAT5A                                                  |
| Calcium signaling                               | 3  | 0.0501   | ADCY3; ADCY8; ITPKA                                                    |
| Focal adhesion                                  | 3  | 0.0649   | MYL2; SRC; PARVB                                                       |

doi:10.1371/journal.pone.0022730.t004

Next, we used GenMIR++ [49] to integrate mRNA, miRNA, and sequence-based predictions into an miRNA-mRNA interaction graph (Figure 5A). GenMIR++ uses predicted miRNA targets (Methods) to generate an initial binary interaction matrix for interactions between miRNA and mRNA (Table 5). Based on this table, a linear Gaussian regression model is created for each mRNA by regressing it on the best subset of miRNAs that can

potentially interact with it. Coefficients are constrained to be negative to indicate the anti-correlation between miRNAs and their targets. Using this method, we identified the top 275 interactions involving 196 mRNAs and 118 miRNAs and organized them to represent the set of interactions predicted in this dataset (Figure 5A). The results show several clusters of miRNA-mRNA regulation. For example, miR-144, miR-937,



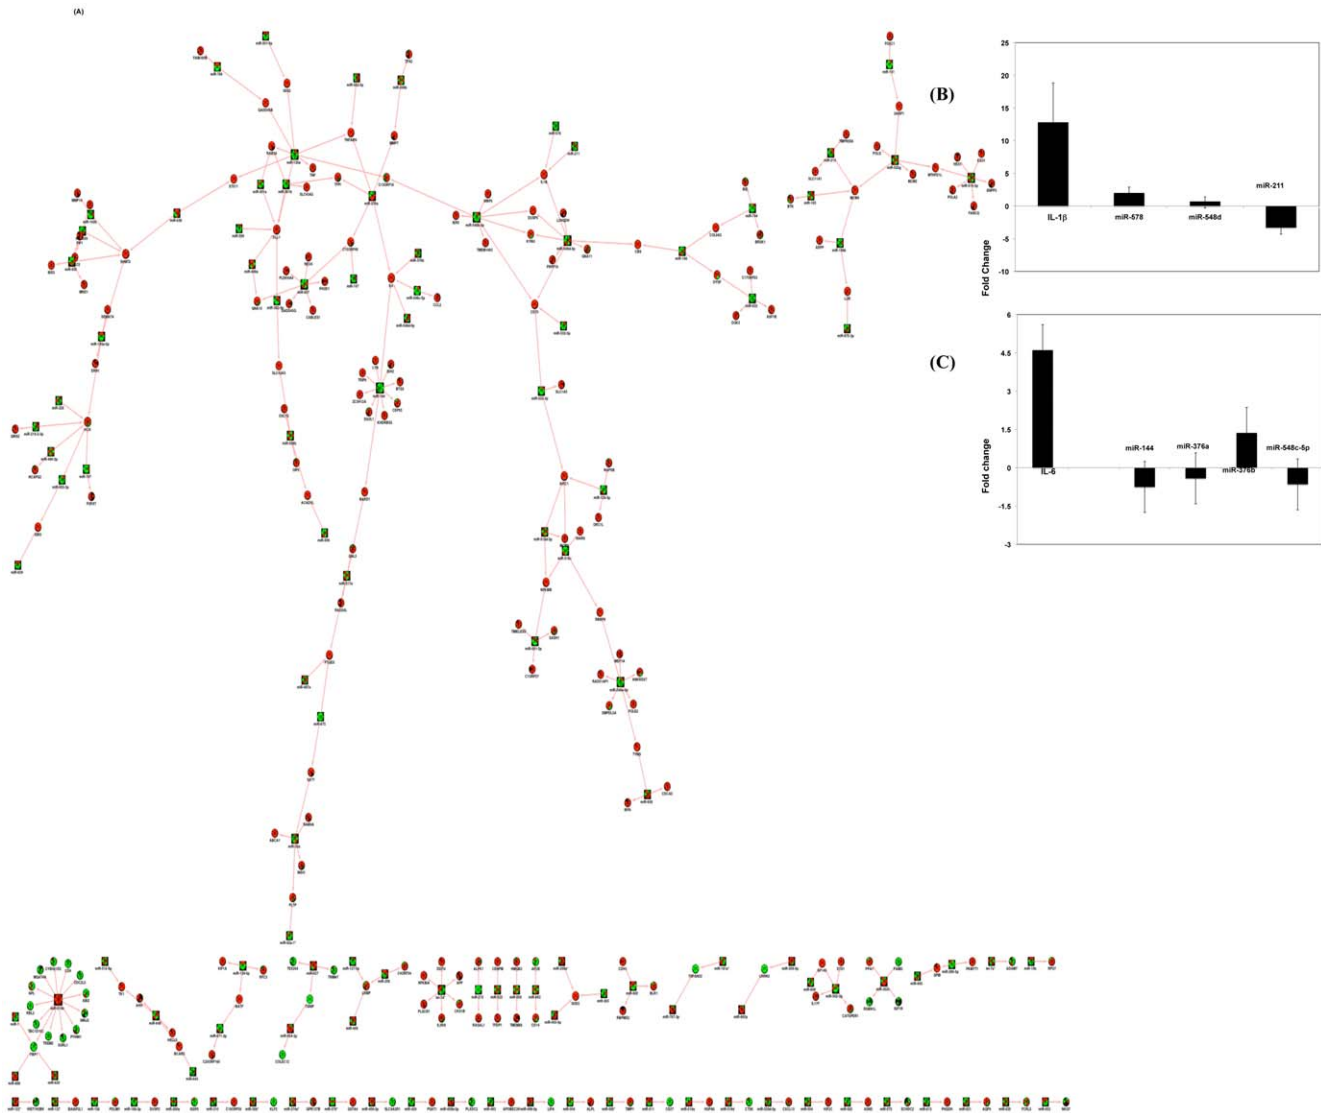

**Figure 5. Network of predicted miRNA-mRNA interactions.** (A) Regression-based method was used to predict the miRNAs (green circles) that are actively regulating mRNAs (red diamonds) in our dataset. (B&C) Validation of miRNA-mRNA interaction partners by RT-PCR using independent samples ( $n=6$ ) for IL-1 $\beta$ (B) and IL-6 (C).  
doi:10.1371/journal.pone.0022730.g005

miR-376, miR-519, and miR-548A-3P are shown to regulate a number of mRNAs, and HCK, NFKBIE, IL6, SHMT2, and MCM4 are regulated by several miRNAs.

To validate the predicted target and miRNA combinations, we selected two miRNA-mRNA interaction clusters and assessed the level of their expression in multiple donor samples ( $n=7$ ). We selected IL-1 $\beta$  and IL-6, which were upregulated in the HIV-1 infected culture but not in the uninfected control (Figure 5B). Several studies indicate that these two molecules are known to be upregulated by HIV-1 infection under similar conditions [58,59,60], although the role of miRNAs in regulating these cytokines is not well defined. Our interaction analyses indicate that IL-1 $\beta$  could potentially be regulated by miR-211, miR-578, and miR-548d-5p. Results indicate that the expression of IL-1 $\beta$  mRNA is upregulated by HIV-1 infection by  $12.81 \pm 6.05$ -fold, whereas miR-578 is upregulated by  $2.0 \pm 0.4$ -fold, miR-548d-5p does not show any change (Figure 5B), and miR-211 is downregulated by  $4.2 \pm 0.2$ -fold. This indicates that among the three miRNAs tested,

one showed a significant negative correlation, one showed no change, and one exhibited positive correlation. We also tested the IL-6 mRNA-miRNA interaction (Figure 5C), and results indicate a partial confirmation of the predicted results. Together, results from these confirmation analyses indicate 60–70% validation of the predicted negative correlation of miRNA and mRNA expression.

## Discussion

Previous studies have performed comparative global profiling of either mRNA or miRNA using HIV-1 infected cells and lymphoid tissue [1,44,61,62,63]. This is the first study to measure the miRNA and mRNA expression profile at the same time point in PBMCs infected with the HIV-1 virus, with the exception of one study that assessed miRNA and mRNA profiling in brain tissues from infected individuals with dementia [64]. The *in vitro* PBMC culture system that we used offers several advantages over the use of cells or tissues derived from HIV-1 infected individuals. The *in*

**Table 5.** Interplay between miRNA and mRNA based on GenMIR ++ analysis.

| miRNA       | Potential targets (mRNA)                                                                    |
|-------------|---------------------------------------------------------------------------------------------|
| let-7d*     | APP, CKS1B, DDIT4, IL3RA, NFKBIA, PLSCR1                                                    |
| miR-129-3p  | KIFC1, NAPS8, ORC1L                                                                         |
| miR-130a    | C13ORF18, DLL1, G0S2, GADD45B, STX11, TNF, TNFAIP6                                          |
| miR-139-5p  | BATF, KIF1A, RFC3                                                                           |
| miR-144     | BARD1, BTG3, CEP55, IDH2, IL6, KHDRB53, LYN, SGOL1, TRIP6, ZC3H12A                          |
| miR-193a-5p | ERN1, HCK, SEMA7A, SHMT2                                                                    |
| miR-196b    | ADFP, LOR, MCM4                                                                             |
| miR-198     | CBS, COL9A2, DYSF                                                                           |
| miR-214     | MCM4, SLC11A1, TMRSS6                                                                       |
| miR-301b    | DLL1, RAB34, SLC43A2, TFP1                                                                  |
| miR-302c    | FAIM3, IGF1R, PPA1, RSN1L                                                                   |
| miR-33a     | ABCA1, INDO, PLTP, RAB9A, SAT1                                                              |
| miR-376a    | C15ORF48, IL6, MMP7, TFP1, TNFAIP6                                                          |
| miR-501-3p  | C10RF57, NFKBIE, SASH1, TIMELESS                                                            |
| miR-502-3p  | CATSPPER1, DTX1, IL17F, SP140                                                               |
| miR-515-5p  | ENPP3, EXO1, FANCG, HES1, MTHFD1L, POLA2                                                    |
| miR-517a    | BARD1, GN3L3, PTGES, RAD54L                                                                 |
| miR-518c    | KIFC1, NFKBIE, RBBP8, WARS                                                                  |
| miR-518d-3p | KIFC1, MCM2, NFKBIE                                                                         |
| miR-519e    | CD9, CDC2L5, CYB561D2, EB12, FBP1, MGAT4A, NINJ2, NPL, PYHIN1, RBL2, SORL1, TBC1D10C, TREM2 |
| miR-520g    | MCM3, MCM4, MTHFD1L, POLQ, UHRF1                                                            |
| miR-526b    | ACADVL, OIP5, OXCT2, SLC43A3                                                                |
| miR-532-3p  | CD70, KIFC1, SLC1A5                                                                         |
| miR-548a-3p | ANKRD57, MEP1A, POLE2, RAD51AP1, RBBP8, SMPDL3A, TYMS                                       |
| miR-548b-3p | C13ORF18, CD70, DUSP5, IER5, IL1B, KYNU, TMEM106C, WBP5                                     |
| miR-548d-3p | CBS, CD70, DUSP5, GNA11, IL1B, KYNU, L2HGDH, PRPF19, IL6                                    |
| miR-627     | TEX264, TRIM47, TXNIP                                                                       |
| miR-632     | ASF1B, C17ORF53, DOK3, DYSF,                                                                |
| miR-648     | AHI1, BCAR3, HELLS, TK1                                                                     |
| miR-659     | CXXC5, SHMT2, TRO                                                                           |
| miR-744     | BID, BRSK1, COL9A2                                                                          |
| miR-920     | BLR1, CDH1, RBPM52                                                                          |
| miR-935     | IER3, MND1, PIF1, SHMT2                                                                     |
| miR-937     | C15ORF48, CABLES1, FHOD1, GADD45G, GNA15, NEU4, PLEKHA4                                     |
| miR-938     | CDCA5, IRF8, TYMS                                                                           |

These miRNAs were selected on the basis that they target at least three mRNAs with the score of >0.50001.

doi:10.1371/journal.pone.0022730.t005

*in vitro* system allows analysis of miRNA and mRNA at precise points after virus infection. It also enables the use of a virus derived from proviral DNA. In combination with the ability to carry out studies using cells from multiple donors, these features may help to identify potential signature patterns with respect to the regulation of gene expression associated with virus infection.

We identified a number of significantly regulated miRNAs and mRNAs in infected PBMCs compared to uninfected control cells.

Among the 704 miRNAs tested, 21 are differentially regulated with statistical significance of <0.05 p value, suggesting that virus infection does alter the miRNA expression profile. It is important to note that the significantly regulated miRNAs showed upregulation ranging from 2.1- to 8.2-fold. Although HIV-1 infection differentially regulated certain miRNAs to a higher degree (>22–88-fold), they did not show statistical significance across multiple donors.

It is worth noting that we did not observe any miRNA that is significantly downregulated by virus infection, whereas Houzet et al. [44] reported downregulation of a number of miRNAs in HIV-1 infected PBMCs obtained from HIV-1 positive subjects. It is not clear whether this difference is due to the assay platforms used, the number of miRNAs assessed, or the methodologies used to evaluate the statistical significance. It is also possible that infection level or viral load/burden could influence the level of miRNA expression. The patient population in the Houzet et al. study had relatively low viral loads compared to the *in vitro* infected cultures. Our results are in line with those from the study by Tatro et al. [64], which reported the dysregulation of miRNA in brain tissue from HIV-1 positive patients compared to that in uninfected control brain tissue. The authors reported that, of the 19 miRNAs that were dysregulated in HIV-1 positive brain tissue compared to uninfected brain tissue, six were also dysregulated in HIV-1 infected PBMCs compared to uninfected cells. They also identified brain-tissue-specific miRNAs, suggesting that their levels in PBMCs may be undetectable or tissue specific as reported before [65,66].

Given that many pathogens including viruses depend on host cellular machinery for their replication, survival, and immune evasion, the hypothesis that particular viruses alter cellular miRNAs may not come as a surprise. Many viruses including herpes virus, Epstein-Barr virus, HCV, HHV-8, and retroviruses are known to affect host cellular miRNAs [67,68,69]. It is not clear, however, whether all these viruses regulate specific miRNAs for replication, immune evasion, and/or immortalization. Searching the literature to identify the miRNAs that are differentially regulated by HCV, HBV, EVB, and herpes viruses, we found a partial overlap among these viruses. For instance, Li et al. [70] performed miRNA profiling during HBV infection and identified 13 miRNAs that are differentially regulated. When we compared these to HIV-1 mediated miRNA regulation, we found that four miRNAs were similarly altered during HIV-1 infection. We also compared the miRNA profiles in two HCV-infected hepatocyte studies [67,70] with our results from HIV-1 infected PBMCs. We observed 33% and 40% similarity, respectively, in upregulated miRNAs between our results and those of the two studies. However, we did not observe miRNAs that were similarly downregulated in HBV, HCV, or HIV infection.

It is important to keep in mind that the expression profiles were generated by using PMBCs comprising different cell types in our study. On the other hand, the HCV-mediated miRNA profiling was assessed in hepatoma cell lines, and that for EBV-induced miRNA was performed in transformed BLCL cells [67,68]. There might be cell-type-specific miRNA and/or altered expression level of miRNAs in different cells that could contribute to the observed differences in miRNA profiling during HCV, HIV, or EBV infection. A recent report by Wu et al. [71] provides further support that the level of miRNA expression might vary among different cell types. Collectively, these studies indicate that host cells might respond to pathogens using similar miRNAs as part of the interactions between the pathogen and the host. Conversely, it is also possible to hypothesize that viruses might target certain miRNAs as part of a general virus-host interaction to aid

replication and survival. A well-defined comparative analysis is required to address this. Though this manuscript focuses on HIV-1 induced host cellular miRNAs dysregulation, HIV-1 also codes for viral miRNAs that are known to modulate host cell functions and viral transcription [72,73,74]. However, the interplay between the viral and host miRNAs is not well defined.

miRNAs regulate the expression of target mRNAs at the post-transcriptional level [75,76,77]. It is now well established that a cluster of miRNAs could regulate a single mRNA and vice versa [78,79]. Our evaluation of the miRNA and mRNA profile (44,000 probes) from RNA isolated at the same time indicates differential regulation of a number of host cellular genes (444) with the FDR-adjusted p value of <0.05. The differentially regulated genes represent pathways including cell cycle, apoptosis, T-cell receptor signaling, DNA repair, and MAPK signaling. These results are in agreement with previously published studies using CD4+ T cells, monocytes, or macrophages infected with HIV-1 [45,46]. Although these studies used purified specific cell types, their results indicate similar pathways, suggesting that the interaction between the virus and the target cell might trigger similar gene regulation. It is not clear whether similar genes are targeted by HIV-1 in each cell type or whether similar pathways are targeted using cell-type-specific genes. Collective information from the published studies as well as our results support the latter possibility.

A recent transcriptome-analysis study using monocytes isolated from HIV-1 patients (ART naïve and post-ART therapy) identified several innate factors as upregulated [45]; these factors were in addition to the cell proliferation, apoptotic, and signaling genes, and they were not found in our study. This discrepancy could be due to the use of different viruses. In our study, we used a CXCR4-receptor-utilizing virus (NL4-3), which primarily targets T cells. Different target cells might respond differently to the interaction between the virus and the host cell, although miRNAs that are known to regulate virus replication (e.g., miRNA-198) have been found to be commonly regulated by HIV-1 in both T and monocyte/macrophage targets [80].

## References

- Li Q, Smith AJ, Schacker TW, Carlis JV, Duan L, et al. (2009) Microarray analysis of lymphatic tissue reveals stage-specific, gene expression signatures in HIV-1 infection. *J Immunol* 183: 1975–1982.
- Wu JQ, Dwyer DE, Dyer WB, Yang YH, Wang B, et al. (2008) Transcriptional profiles in CD8+ T cells from HIV+ progressors on HAART are characterized by coordinated up-regulation of oxidative phosphorylation enzymes and interferon responses. *Virology* 380: 124–135.
- van 't Wout AB, Lehman GK, Mikheeva SA, O'Keeffe GC, Katze MG, et al. (2003) Cellular gene expression upon human immunodeficiency virus type 1 infection of CD4(+) T-cell lines. *J Virol* 77: 1392–1402.
- García-Arriaza J, Najera JL, Gomez CE, Sorzano CO, Esteban M (2010) Immunogenic profiling in mice of a HIV/AIDS vaccine candidate (MVA-B) expressing four HIV-1 antigens and potentiation by specific gene deletions. *PLoS One* 5: e12395.
- van 't Wout AB, Swain JV, Schindler M, Rao U, Pathmajayan MS, et al. (2005) Nef induces multiple genes involved in cholesterol synthesis and uptake in human immunodeficiency virus type 1-infected T cells. *J Virol* 79: 10053–10058.
- Zaunders J, Dyer WB, Churchill M (2011) The Sydney Blood Bank Cohort: implications for viral fitness as a cause of elite control. *Curr Opin HIV AIDS* 6: 151–156.
- Herbeck JT, Gottlieb GS, Winkler CA, Nelson GW, An P, et al. (2010) Multistage genome-wide association study identifies a locus at 1q41 associated with rate of HIV-1 disease progression to clinical AIDS. *J Infect Dis* 201: 618–626.
- McMichael AJ, Jones EY (2010) Genetics. First-class control of HIV-1. *Science* 330: 1488–1490.
- Limou S, Le Clerc S, Coulonges C, Carpentier W, Dina C, et al. (2009) Genome-wide association study of an AIDS-nonprogression cohort emphasizes the role played by HLA genes (ANRS Genome-wide Association Study 02). *J Infect Dis* 199: 419–426.
- Smith MW, Dean M, Carrington M, Winkler C, Huttley GA, et al. (1997) Contrasting genetic influence of CCR2 and CCR5 variants on HIV-1 infection

and disease progression. Hemophilia Growth and Development Study (HGDS), Multicenter AIDS Cohort Study (MACS), Multicenter Hemophilia Cohort Study (MHCS), San Francisco City Cohort (SFCC), ALIVE Study. *Science* 277: 959–965.

## Supporting Information

### Table S1 MicroRNAs over expressed in HIV-1 NL43 infected cultures compared to uninfected control cells.

Cut-off was 2 fold change.  
(DOCX)

### Table S2 MicroRNAs under expressed in HIV-1 NL43 infected cultures compared to uninfected control cells.

Cut-off was 2-fold change.  
(DOCX)

## Acknowledgments

We would also like to thank Dr. Alagarsamy Srinivasan for his critical comments and suggestions.

## Author Contributions

Conceived and designed the experiments: AG VA. Performed the experiments: AG PN CB CZ. Analyzed the data: AG PN H-SL CB AT ZB-J SM VA. Wrote the paper: AG CZ ZB-J VA.

- Dragic T, Litvin V, Allaway GP, Martin SR, Huang Y, et al. (1996) HIV-1 entry into CD4+ cells is mediated by the chemokine receptor CC-CKR-5. *Nature* 381: 667–673.
- Hladik F, Liu H, Speelmon E, Livingston-Rosanoff D, Wilson S, et al. (2005) Combined effect of CCR5-Delta32 heterozygosity and the CCR5 promoter polymorphism -2459 A/G on CCR5 expression and resistance to human immunodeficiency virus type 1 transmission. *J Virol* 79: 11677–11684.
- Mummidi S, Ahuja SS, Gonzalez E, Anderson SA, Santiago EN, et al. (1998) Genealogy of the CCR5 locus and chemokine system gene variants associated with altered rates of HIV-1 disease progression. *Nat Med* 4: 786–793.
- O'Brien SJ, Nelson GW (2004) Human genes that limit AIDS. *Nature Genetics* 36: 565–574.
- Jeannot M, Sztajzel R, Carpentier N, Hirschel B, Tiercy JM (1989) HLA antigens are risk factors for development of AIDS. *J Acquir Immune Defic Syndr* 2: 28–32.
- Nieto G, Barber Y, Rubio MC, Rubio M, Fibla J (2004) Association between AIDS disease progression rates and the Fok-I polymorphism of the VDR gene in a cohort of HIV-1 seropositive patients. *J Steroid Biochem Mol Biol* 89-90: 199–207.
- Paxton WA, Kang S (1998) Chemokine receptor allelic polymorphisms: relationships to HIV resistance and disease progression. *Semin Immunol* 10: 187–194.
- Ballana E, Senserrich J, Pauls E, Faner R, Mercader JM, et al. (2010) ZNRD1 (zinc ribbon domain-containing 1) is a host cellular factor that influences HIV-1 replication and disease progression. *Clin Infect Dis* 50: 1022–1032.
- Ciccosanti F, Corazzari M, Soldani F, Matarrese P, Pagliarini V, et al. Proteomic analysis identifies prohibitin down-regulation as a crucial event in the mitochondrial damage observed in HIV-infected patients. *Antivir Ther* 15: 377–390.

20. Melendez LM, Colon K, Rivera L, Rodriguez-Franco E, Toro-Nieves D (2008) Proteomic analysis of HIV-infected macrophages. *J Neuroimmune Pharmacol* 6: 89–106.
21. Ringrose JH, Jeeninga RE, Berkhout B, Speijer D (2008) Proteomic studies reveal coordinated changes in T-cell expression patterns upon infection with human immunodeficiency virus type 1. *J Virol* 82: 4320–4330.
22. Zhang L, Jia X, Zhang X, Sun J, Peng X, et al. (2008) Proteomic analysis of PBMCs: characterization of potential HIV-associated proteins. *Proteome Sci* 8: 12.
23. Geiss GK, Bumgarner RE, An MC, Agy MB, van 't Wout AB, et al. (2000) Large-scale monitoring of host cell gene expression during HIV-1 infection using cDNA microarrays. *Virology* 266: 8–16.
24. Ryo A, Suzuki Y, Arai M, Kondoh N, Wakatsuki T, et al. (2000) Identification and characterization of differentially expressed mRNAs in HIV type 1-infected human T cells. *AIDS Res Hum Retroviruses* 16: 995–1005.
25. Vahey MT, Nau ME, Jagodzinski LL, Yalley-Ogunro J, Taubman M, et al. (2002) Impact of viral infection on the gene expression profiles of proliferating normal human peripheral blood mononuclear cells infected with HIV type 1 RF. *AIDS Res Hum Retroviruses* 18: 179–192.
26. Burgener A, Sainsbury J, Plummer FA, Ball TB Systems biology-based approaches to understand HIV-exposed uninfected women. *Curr HIV/AIDS Rep* 7: 53–59.
27. Hirbod T, Nilsson J, Andersson S, Uberti-Foppa C, Ferrari D, et al. (2006) Upregulation of interferon-alpha and RANTES in the cervix of HIV-1-seronegative women with high-risk behavior. *J Acquir Immune Defic Syndr* 43: 137–143.
28. Mothe B, Ibarondo J, Llano A, Brander C (2009) Virological, immune and host genetics markers in the control of HIV infection. *Dis Markers* 27: 105–120.
29. Charurat M, Blattner W, Hershov R, Buck A, Zorrilla CD, et al. (2004) Changing trends in clinical AIDS presentations and survival among HIV-1-infected women. *J Womens Health (Larchmt)* 13: 719–730.
30. Poropatich K, Sullivan DJ, Jr. (2011) Human immunodeficiency virus type 1 long-term non-progressors: the viral, genetic and immunological basis for disease non-progression. *J Gen Virol* 92: 247–268.
31. Barnes MR, Deharo S, Grocock RJ, Brown JR, Sansau P (2007) The micro RNA target paradigm: a fundamental and polymorphic control layer of cellular expression. *Expert Opin Biol Ther* 7: 1387–1399.
32. Carthew RW, Sontheimer EJ (2009) Origins and Mechanisms of miRNAs and siRNAs. *Cell* 136: 642–655.
33. Chua JH, Armugam A, Jayaseelan K (2009) MicroRNAs: biogenesis, function and applications. *Curr Opin Mol Ther* 11: 189–199.
34. Alvarez-Garcia I, Miska EA (2005) MicroRNA functions in animal development and human disease. *Development* 132: 4653–4662.
35. Chang TC, Mendell JT (2007) microRNAs in vertebrate physiology and human disease. *Annu Rev Genomics Hum Genet* 8: 215–239.
36. Baltimore D, Boldin MP, O'Connell RM, Rao DS, Taganov KD (2008) MicroRNAs: new regulators of immune cell development and function. *Nat Immunol* 9: 839–845.
37. Barik S (2005) Silence of the transcripts: RNA interference in medicine. *J Mol Med* 83: 764–773.
38. Amariglio N, Rechavi G (2007) A-to-I RNA editing: a new regulatory mechanism of global gene expression. *Blood Cells Mol Dis* 39: 151–155.
39. Gomase VS, Parundekar AN (2009) microRNA: human disease and development. *Int J Bioinform Res Appl* 5: 479–500.
40. Fritz JH, Girardin SE, Philpott DJ (2006) Innate immune defense through RNA interference. *Sci STKE*. 2006: pe27.
41. Carissimi C, Fulci V, Macino G (2009) MicroRNAs: novel regulators of immunity. *Autoimmun Rev* 8: 520–524.
42. O'Connell RM, Rao DS, Chaudhuri AA, Baltimore D (2010) Physiological and pathological roles for microRNAs in the immune system. *Nat Rev Immunol* 10: 111–122.
43. Wang X, Ye L, Hou W, Zhou Y, Wang YJ, et al. (2009) Cellular microRNA expression correlates with susceptibility of monocytes/macrophages to HIV-1 infection. *Blood* 113: 671–674.
44. Houzet L, Yeung ML, de Lame V, Desai D, Smith SM, et al. (2008) MicroRNA profile changes in human immunodeficiency virus type 1 (HIV-1) seropositive individuals. *Retrovirology* 5: 118.
45. Van den Bergh R, Florence E, Vlieghe E, Boonefaes T, Grooten J, et al. (2010) Transcriptome analysis of monocyte-HIV interactions. *Retrovirology* 7: 53.
46. Rotger M, Dang KK, Fellay J, Heinzen EL, Feng S, et al. (2010) Genome-wide mRNA expression correlates of viral control in CD4+ T-cells from HIV-1-infected individuals. *PLoS Pathog* 6: e1000781.
47. Majumder B, Janket ML, Schafer EA, Schaubert K, Huang XL, et al. (2005) Human immunodeficiency virus type 1 Vpr impairs dendritic cell maturation and T-cell activation: implications for viral immune escape. *J Virol* 79: 7990–8003.
48. Venkatachari NJ, Buchanan WG, Ayyavoo V (2008) Human immunodeficiency virus (HIV-1) infection selectively downregulates PD-1 expression in infected cells and protects the cells from early apoptosis in vitro and in vivo. *Virology* 376: 140–153.
49. Huang JC, Morris QD, Frey BJ (2007) Bayesian inference of MicroRNA targets from sequence and expression data. *J Comput Biol* 14: 550–563.
50. Griffiths-Jones S, Saini HK, van Dongen S, Enright AJ (2008) miRBase: tools for microRNA genomics. *Nucleic Acids Res* 36: D154–158.
51. Tusher VG, Tibshirani R, Chu G (2001) Significance analysis of microarrays applied to the ionizing radiation response. *Proc Natl Acad Sci U S A* 98: 5116–5121.
52. Weber J, Rangel HR, Chakraborty B, Tadele M, Martinez MA, et al. (2003) A novel TaqMan real-time PCR assay to estimate ex vivo human immunodeficiency virus type 1 fitness in the era of multi-target (pol and env) antiretroviral therapy. *J Gen Virol* 84: 2217–2228.
53. Asmuth DM, Wang N, Lu Y, Li XD, Reece L, et al. (2005) Cell cycle kinetic dysregulation in HIV-infected normal lymphocytes. *Cytometry A* 66: 41–51.
54. Chan EY, Qian WJ, Diamond DL, Liu T, Gritsenko MA, et al. (2007) Quantitative analysis of human immunodeficiency virus type 1-infected CD4+ cell proteome: dysregulated cell cycle progression and nuclear transport coincide with robust virus production. *J Virol* 81: 7571–7583.
55. Backes C, Meese E, Lenhof HP, Keller A (2010) A dictionary on microRNAs and their putative target pathways. *Nucleic Acids Res* 38: 4476–4486.
56. Bartel DP (2009) MicroRNAs: target recognition and regulatory functions. *Cell* 136: 215–233.
57. Shalgi R, Lieber D, Oren M, Pilpel Y (2007) Global and local architecture of the mammalian microRNA-transcription factor regulatory network. *PLoS Comput Biol* 3: e131.
58. Sundaravaran V, Mehta R, Harris DT, Zack JA, Ahmad N Differential expression and interaction of host factors augment HIV-1 gene expression in neonatal mononuclear cells. *Virology* 400: 32–43.
59. Brown JN, Kohler JJ, Coberley CR, Sleasman JW, Goodenow MM (2008) HIV-1 activates macrophages independent of Toll-like receptors. *PLoS One* 3: e3664.
60. Xing HQ, Hayakawa H, Izumo K, Kubota R, Gelpi E, et al. (2009) In vivo expression of proinflammatory cytokines in HIV encephalitis: an analysis of 11 autopsy cases. *Neuropathology* 29: 433–442.
61. Borjabad A, Brooks AI, Volsky DJ (2009) Gene expression profiles of HIV-1-infected glia and brain: toward better understanding of the role of astrocytes in HIV-1-associated neurocognitive disorders. *J Neuroimmune Pharmacol* 5: 44–62.
62. Li Y, Chan EY, Katze MG (2007) Functional genomics analyses of differential macaque peripheral blood mononuclear cell infections by human immunodeficiency virus-1 and simian immunodeficiency virus. *Virology* 366: 137–149.
63. Noorbakhsh F, Ramachandran R, Barsby N, Ellestad KK, LeBlanc A, et al. (2010) MicroRNA profiling reveals new aspects of HIV neurodegeneration: caspase-6 regulates astrocyte survival. *FASEB J* 24: 1799–1812.
64. Tatro ET, Scott ER, Nguyen TB, Salaria S, Banerjee S, et al. Evidence for Alteration of Gene Regulatory Networks through MicroRNAs of the HIV-infected brain: novel analysis of retrospective cases. *PLoS One* 5: e10337.
65. Zhao X, He X, Han X, Yu Y, Ye F, et al. (2010) MicroRNA-mediated control of oligodendrocyte differentiation. *Neuron* 65: 612–626.
66. Lagos-Quintana M, Rauhut R, Yalcin A, Meyer J, Lendeckel W, et al. (2002) Identification of tissue-specific microRNAs from mouse. *Curr Biol* 12: 735–739.
67. Liu X, Wang T, Wakita T, Yang W (2010) Systematic identification of microRNA and messenger RNA profiles in hepatitis C virus-infected human hepatoma cells. *Virology* 398: 57–67.
68. Lee JE, Nam HY, Shim SM, Bac GR, Han BG, et al. (2010) Expression phenotype changes of EBV-transformed lymphoblastoid cell lines during long-term subculture and its clinical significance. *Cell Prolif* 43: 378–384.
69. Imig J, Motsch N, Zhu JY, Barth S, Okoniewski M, et al. (2010) microRNA profiling in Epstein-Barr virus-associated B-cell lymphoma. *Nucleic Acids Res* 39: 1880–1893.
70. Li LM, Hu ZB, Zhou ZX, Chen X, Liu FY, et al. (2010) Serum microRNA profiles serve as novel biomarkers for HBV infection and diagnosis of HBV-positive hepatocarcinoma. *Cancer Res* 70: 9798–9807.
71. Wu H, Neilson JR, Kumar P, Manocha M, Shankar P, et al. (2007) miRNA profiling of naive, effector and memory CD8 T cells. *PLoS One* 2: e1020.
72. Kaul D, Ahlawat A, Gupta SD (2009) HIV-1 genome-encoded hiv1-mir-H1 impairs cellular responses to infection. *Mol Cell Biochem* 323: 143–148.
73. Klase Z, Winograd R, Davis J, Carpio L, Hildreth R, et al. (2009) HIV-1 TAR miRNA protects against apoptosis by altering cellular gene expression. *Retrovirology* 6: 18.
74. Narayanan A, Kehn-Hall K, Bailey C, Kashanchi F (2010) Analysis of the roles of HIV-derived microRNAs. *Expert Opin Biol Ther* 11: 17–29.
75. Zhang C (2009) Novel functions for small RNA molecules. *Curr Opin Mol Ther* 11: 641–651.
76. Fabian MR, Sundermeier TR, Sonenberg N (2009) Understanding how miRNAs post-transcriptionally regulate gene expression. *Prog Mol Subcell Biol* 50: 1–20.
77. Fabian MR, Sonenberg N, Filipowicz W (2010) Regulation of mRNA translation and stability by microRNAs. *Annu Rev Biochem* 79: 351–379.
78. Huang J, Liang Z, Yang B, Tian H, Ma J, et al. (2007) Derepression of microRNA-mediated protein translation inhibition by apolipoprotein B mRNA-editing enzyme catalytic polypeptide-like 3G (APOBEC3G) and its family members. *J Biol Chem* 282: 33632–33640.
79. Huntzinger E, Izaurralde E Gene silencing by microRNAs: contributions of translational repression and mRNA decay. *Nat Rev Genet* 12: 99–110.
80. Sung TL, Rice AP (2009) miR-198 inhibits HIV-1 gene expression and replication in monocytes and its mechanism of action appears to involve repression of cyclin T1. *PLoS Pathog* 5: e1000263.
81. Imig J, Motsch N, Zhu JY, Barth S, Okoniewski M, et al. (2010) microRNA profiling in Epstein-Barr virus-associated B-cell lymphoma. *Nucleic Acids Res*.
