# Supplementary material for: Comparative Expression Profile of miRNA and mRNA in Primary Peripheral Blood Mononuclear Cells Infected with Human Immunodeficiency Virus (HIV-1)
Source: PLOS journal article supplement (doi:10.1371/journal.pone.0022730), 2011-07-28
Supplement: S1 (10.1371/journal.pone.0022730.s001) [file journal.pone.0022730.s001]

| **Table S1:** MicroRNAs over expressed in HIV-1 NL43 infected cultures compared to uninfected control cells. Cut-off was 2 fold change | | | | | | |
| --- | --- | --- | --- | --- | --- | --- |
| **3100**  **Mature ID** | **Fold change** | **p-value** |  | **3101**  **Mature ID** | **Fold change** | **p-value** |
| miR-138 | 2.1364 | 0.0130* |  | miR-593 | 2.3247 | 0.00104* |
| miR-518f* | 3.3215 | 0.0308* |  | miR-892a | 2.4136 | 0.01298* |
| miR-187 | 2.0631 | 0.035* |  | miR-1253 | 3.1465 | 0.04194* |
| miR-938 | 3.6903 | 0.0399* |  | miR-1470 | 3.317 | 0.04256* |
| miR-519b-5p | 2.8366 | 0.050* |  | miR-888* | 4.8503 | 0.04695* |
| miR-302a | 3.6139 | 0.050* |  | miR-33b* | 2.9726 | 0.04844* |
| miR-636 | 2.5808 | 0.0548* |  | miR-1286 | 3.3554 | 0.05239* |
| miR-548a-5p | 2.6281 | 0.0712 |  | miR-760 | 2.9002 | 0.05752* |
| miR-515-3p | 2.8684 | 0.0735 |  | miR-18b* | 2.9279 | 0.062843 |
| miR-580 | 2.0741 | 0.0756 |  | miR-888 | 2.4047 | 0.064892 |
| miR-548c-3p | 2.4631 | 0.0851 |  | miR-664* | 2.5581 | 0.071712 |
| miR-210 | 2.2778 | 0.0861 |  | miR-661 | 3.2357 | 0.072069 |
| miR-623 | 2.4071 | 0.0936 |  | miR-1207-3p | 2.306 | 0.076027 |
| miR-619 | 2.5544 | 0.0939 |  | miR-1247 | 3.1597 | 0.079507 |
| miR-325 | 2.6242 | 0.0970 |  | miR-939 | 2.5568 | 0.080136 |
| miR-449a | 3.7929 | 0.1005 |  | miR-596 | 2.9965 | 0.081327 |
| miR-630 | 3.8467 | 0.1009 |  | miR-509-5p | 2.2809 | 0.083217 |
| miR-370 | 3.6401 | 0.1012 |  | miR-1307 | 3.2328 | 0.0841 |
| miR-650 | 2.7204 | 0.1135 |  | miR-1181 | 2.7878 | 0.084227 |
| miR-637 | 2.9681 | 0.1230 |  | miR-302b* | 2.459 | 0.084989 |
| miR-489 | 2.3217 | 0.1277 |  | miR-1265 | 2.8578 | 0.087393 |
| miR-143 | 2.3073 | 0.1486 |  | miR-1251 | 2.0656 | 0.088129 |
| miR-375 | 2.5018 | 0.1537 |  | miR-631 | 2.7358 | 0.090904 |
| let-7f | 6.638 | 0.1551 |  | miR-936 | 6.0417 | 0.09855 |
| miR-208a | 2.0069 | 0.1565 |  | miR-1290 | 2.5116 | 0.102647 |
| miR-587 | 3.9996 | 0.1593 |  | miR-219-1-3p | 2.7598 | 0.102892 |
| miR-19a | 5.3806 | 0.1724 |  | miR-1226* | 2.3299 | 0.105812 |
| miR-629 | 2.2933 | 0.1805 |  | miR-1257 | 2.3783 | 0.10697 |
| miR-885-5p | 3.9899 | 0.1807 |  | miR-539 | 2.1009 | 0.108333 |
| miR-502-5p | 3.0006 | 0.1962 |  | miR-300 | 2.4185 | 0.109508 |
| miR-768-5p | 6.8133 | 0.2049 |  | miR-615-5p | 2.9668 | 0.113412 |
| miR-298 | 2.4811 | 0.2248 |  | miR-1233 | 2.0639 | 0.113981 |
| miR-632 | 2.0992 | 0.2384 |  | miR-1258 | 2.9563 | 0.115526 |
| miR-410 | 88.4108 | 0.2417 |  | miR-519e | 2.8442 | 0.119735 |
| miR-496 | 2.3739 | 0.2425 |  | miR-1469 | 3.4789 | 0.120258 |
| miR-329 | 2.532 | 0.2429 |  | miR-1234 | 3.2887 | 0.12393 |
| miR-202 | 2.5698 | 0.2445 |  | miR-1225-5p | 2.5887 | 0.12408 |
| miR-124 | 2.4611 | 0.2517 |  | miR-1537 | 2.2164 | 0.128455 |
| miR-199a-3p | 3.7027 | 0.2530 |  | miR-431* | 3.2783 | 0.129395 |
| miR-485-3p | 5.7394 | 0.2565 |  | miR-769-3p | 2.1218 | 0.130836 |
| miR-511 | 4.0581 | 0.2624 |  | miR-195* | 2.4973 | 0.132247 |
| miR-766 | 2.0178 | 0.2630 |  | miR-191* | 2.7564 | 0.133404 |
| miR-584 | 4.1234 | 0.2636 |  | miR-1304 | 2.2433 | 0.133987 |
| miR-492 | 5.0351 | 0.2659 |  | miR-1287 | 2.0537 | 0.135248 |
| miR-128 | 2.8392 | 0.2707 |  | miR-767-3p | 2.0313 | 0.139694 |
| miR-518d-3p | 2.4736 | 0.2722 |  | miR-1225-3p | 2.0131 | 0.14226 |
| miR-130b | 2.8428 | 0.2767 |  | miR-133a | 2.2039 | 0.143271 |
| miR-34a | 3.0554 | 0.2822 |  | miR-1295 | 7.0539 | 0.148218 |
| miR-649 | 3.72 | 0.2835 |  | miR-1267 | 3.875 | 0.156009 |
| miR-302c | 4.3314 | 0.2864 |  | miR-193a-3p | 2.0876 | 0.157648 |
| miR-600 | 2.517 | 0.2879 |  | miR-10b* | 2.3243 | 0.162144 |
| miR-524-5p | 24.849 | 0.2919 |  | miR-1228* | 2.5023 | 0.163662 |
| miR-566 | 5.0462 | 0.2947 |  | miR-499-5p | 2.3763 | 0.16632 |
| miR-518b | 2.6631 | 0.295007 |  | miR-1826 | 3.5783 | 0.16763 |
| miR-448 | 5.7234 | 0.295097 |  | miR-1825 | 3.6796 | 0.167958 |
| miR-500 | 3.8288 | 0.297071 |  | miR-1298 | 2.5737 | 0.168879 |
| miR-512-3p | 4.5053 | 0.297839 |  | miR-1237 | 2.7127 | 0.170383 |
| miR-508-3p | 2.2458 | 0.298035 |  | miR-577 | 2.3496 | 0.171801 |
| miR-122 | 5.9163 | 0.298637 |  | miR-1269 | 2.0139 | 0.180869 |
| miR-585 | 7.2727 | 0.299226 |  | miR-450b-3p | 2.0045 | 0.185647 |
| miR-323-3p | 15.8812 | 0.29969 |  | let-7b* | 2.0164 | 0.187233 |
| miR-498 | 4.211 | 0.299696 |  | miR-550* | 2.0095 | 0.187247 |
| miR-488 | 2.5569 | 0.300672 |  | miR-891a | 2.4234 | 0.189139 |
| miR-452 | 2.3304 | 0.302594 |  | miR-1224-3p | 2.39 | 0.190114 |
| miR-516a-3p | 2.9579 | 0.303099 |  | miR-409-3p | 2.1546 | 0.198852 |
| miR-374b | 15.874 | 0.306545 |  | miR-135a* | 4.3376 | 0.213271 |
| miR-361-5p | 2.2625 | 0.307977 |  | miR-1238 | 4.0768 | 0.214695 |
| miR-19b | 5.3022 | 0.31618 |  | miR-1538 | 2.418 | 0.221826 |
| miR-133b | 2.6344 | 0.317694 |  | miR-943 | 2.0959 | 0.222048 |
| miR-20b | 2.03 | 0.318847 |  | miR-513a-3p | 2.341 | 0.22296 |
| miR-624* | 3.2195 | 0.32469 |  | miR-886-3p | 2.0678 | 0.225315 |
| miR-454 | 2.5368 | 0.324694 |  | miR-323-5p | 2.551 | 0.239386 |
| miR-486-5p | 2.8762 | 0.346935 |  | miR-1303 | 2.4429 | 0.259444 |
| miR-219-5p | 2.0184 | 0.351602 |  | miR-220a | 2.1058 | 0.286804 |
| miR-142-3p | 4.5579 | 0.36909 |  | miR-1207-5p | 16.8969 | 0.299135 |
| miR-30b | 4.1533 | 0.376695 |  | miR-656 | 2.0151 | 0.311856 |
| miR-768-3p | 2.2189 | 0.379348 |  | miR-23a* | 2.4855 | 0.31419 |
| miR-200a* | 4.1166 | 0.382951 |  | miR-625* | 2.6568 | 0.31475 |
| miR-345 | 2.5885 | 0.389107 |  | miR-1539 | 2.2078 | 0.324303 |
| miR-135b | 3.1466 | 0.403221 |  | miR-933 | 2.3223 | 0.33319 |
| miR-562 | 2.1376 | 0.408102 |  | miR-99b | 3.5684 | 0.341827 |
| miR-26a | 5.3153 | 0.412143 |  | miR-1296 | 2.3579 | 0.3844 |
| miR-15b | 3.4746 | 0.418178 |  | miR-574-3p | 2.2809 | 0.389006 |
| miR-421 | 2.1181 | 0.432392 |  | miR-224 | 2.1201 | 0.531478 |
| miR-106b | 3.7391 | 0.436052 |  | miR-548h | 2.1997 | 0.589604 |
| miR-1 | 2.8615 | 0.459034 |  | miR-15b* | 2.2511 | 0.641099 |
| miR-373 | 2.2185 | 0.470102 |  | miR-1224-5p | 2.1126 | 0.84441 |
| miR-103 | 3.3692 | 0.479328 |  | miR-200b* | 2.5237 | 0.860667 |
| miR-195 | 6.5569 | 0.481124 |  |  |  |  |
| miR-425 | 3.3454 | 0.485621 |  |  |  |  |
| miR-625 | 2.1915 | 0.48641 |  |  |  |  |
| miR-30a | 3.9077 | 0.509072 |  |  |  |  |
| miR-155 | 3.7472 | 0.525727 |  |  |  |  |
| miR-203 | 3.0449 | 0.530379 |  |  |  |  |
| miR-571 | 2.3051 | 0.548223 |  |  |  |  |
| miR-151-3p | 5.3322 | 0.594661 |  |  |  |  |
| miR-140-5p | 2.7058 | 0.600693 |  |  |  |  |
| miR-9 | 2.4419 | 0.621281 |  |  |  |  |
| miR-18b | 2.002 | 0.624767 |  |  |  |  |
| miR-182 | 3.5081 | 0.640235 |  |  |  |  |
| miR-518a-3p | 2.2593 | 0.642228 |  |  |  |  |
| miR-196a | 3.2309 | 0.689646 |  |  |  |  |
| miR-671-3p | 2.0244 | 0.699026 |  |  |  |  |
| miR-301a | 2.2875 | 0.699389 |  |  |  |  |
| miR-127-3p | 3.2795 | 0.704334 |  |  |  |  |
| miR-99a | 2.4978 | 0.782874 |  |  |  |  |
| miR-610 | 2.3055 | 0.852576 |  |  |  |  |
| miR-98 | 3.6498 | 0.923919 |  |  |  |  |
| miR-575 | 2.0896 | 0.942927 |  |  |  |  |
| miR-365 | 2.7025 | 0.97819 |  |  |  |  |
| miR-331-5p | 2.3332 | 0.984888 |  |  |  |  |
