# Supplementary material for: Comparative Expression Profile of miRNA and mRNA in Primary Peripheral Blood Mononuclear Cells Infected with Human Immunodeficiency Virus (HIV-1)
Source: PLOS journal article supplement (doi:10.1371/journal.pone.0022730), 2011-07-28
Supplement: S2 (10.1371/journal.pone.0022730.s002) [file journal.pone.0022730.s002]

**Table S2:** MicroRNAs under expressed in HIV-1 NL43 infected cultures compared to uninfected control cells. Cut-off was 2-fold change

| **3100**  **Mature ID** | **Fold change** | **p-value** |
| --- | --- | --- |
| miR-937 | -2.3569 | 0.198623 |
| miR-633  miR-633  miR-633  miR-633 | -6.7236 | 0.377292 |
| miR-412 | -2.725 | 0.377408 |
| let-7g | -2.1626 | 0.391953 |
| miR-141* | -3.4274 | 0.07488 |
| miR-29c* | -5.0011 | 0.085998 |
| miR-1259 | -2.4951 | 0.109529 |
| miR-1275 | -3.4273 | 0.146678 |
| miR-29b-1* | -2.0821 | 0.311027 |
| miR-92a-2* | -5.9894 | 0.377152 |
| miR-1266 | -5.5029 | 0.377315 |
| miR-365* | -2.6554 | 0.379657 |
| miR-602 | -38.7173 | 0.66409 |
| miR-120 | -3.3453 | 0.96637 |
